# Supplementary material for: Radiomic Features Applied to Contrast Enhancement Spectral Mammography: Possibility to Predict Breast Cancer Molecular Subtypes in a Non-Invasive Manner
Source: MDPI journal article supplement (doi:10.3390/ijms232315322), 2022-12-05
Supplement: s1 [file s1]

Supplementary Figure S1

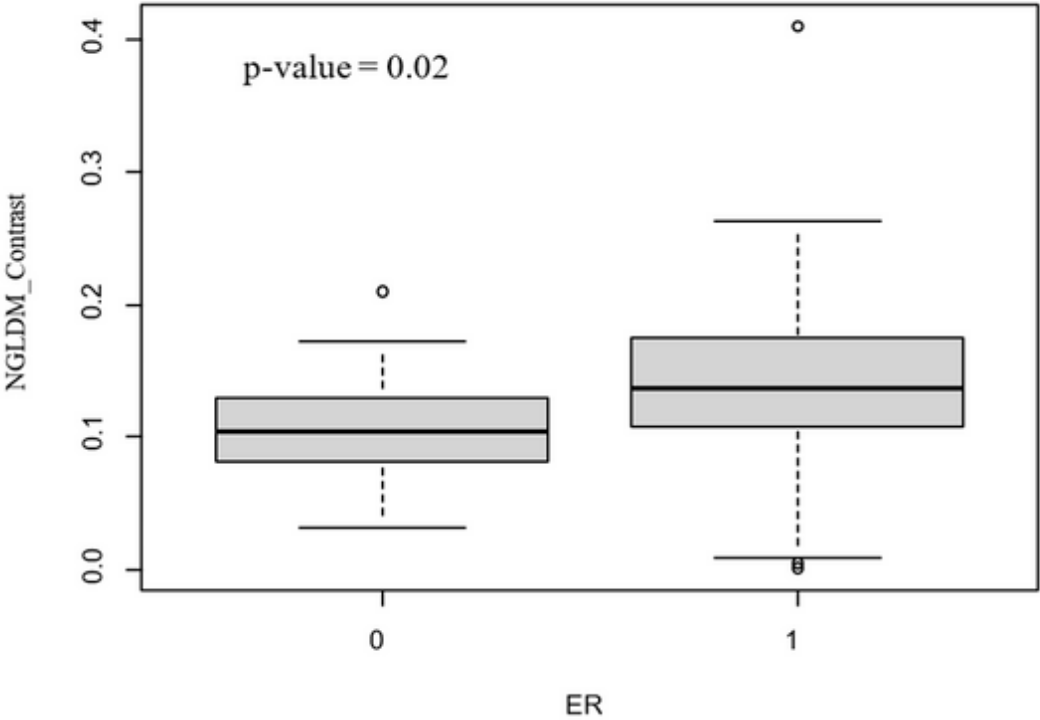

Supplementary Figure S2

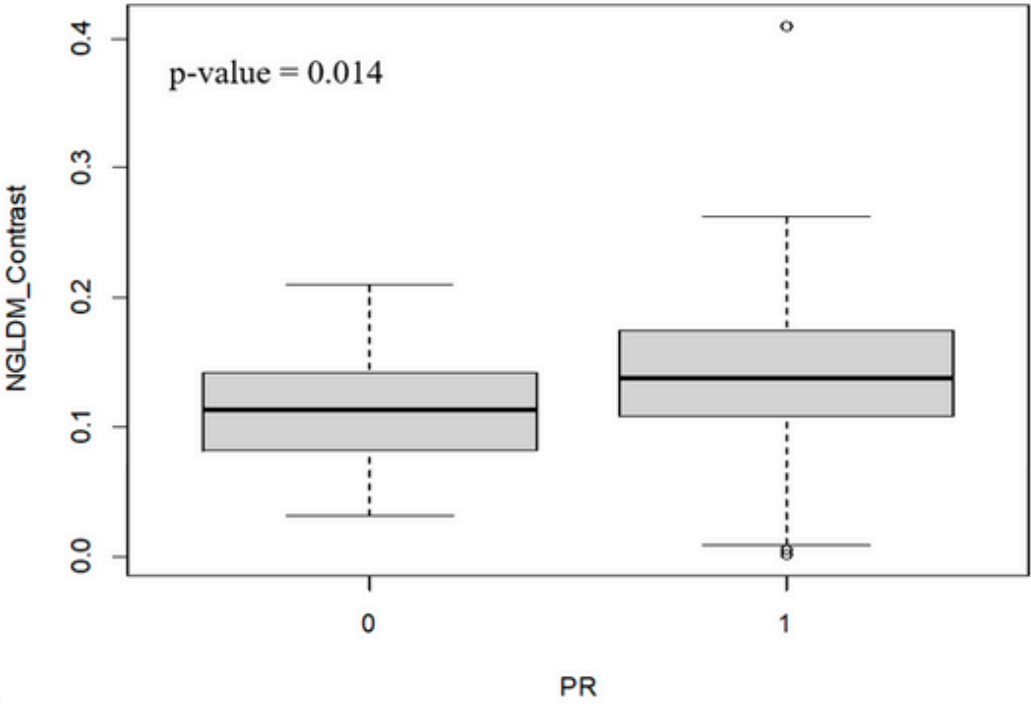

# Supplementary Figure S3

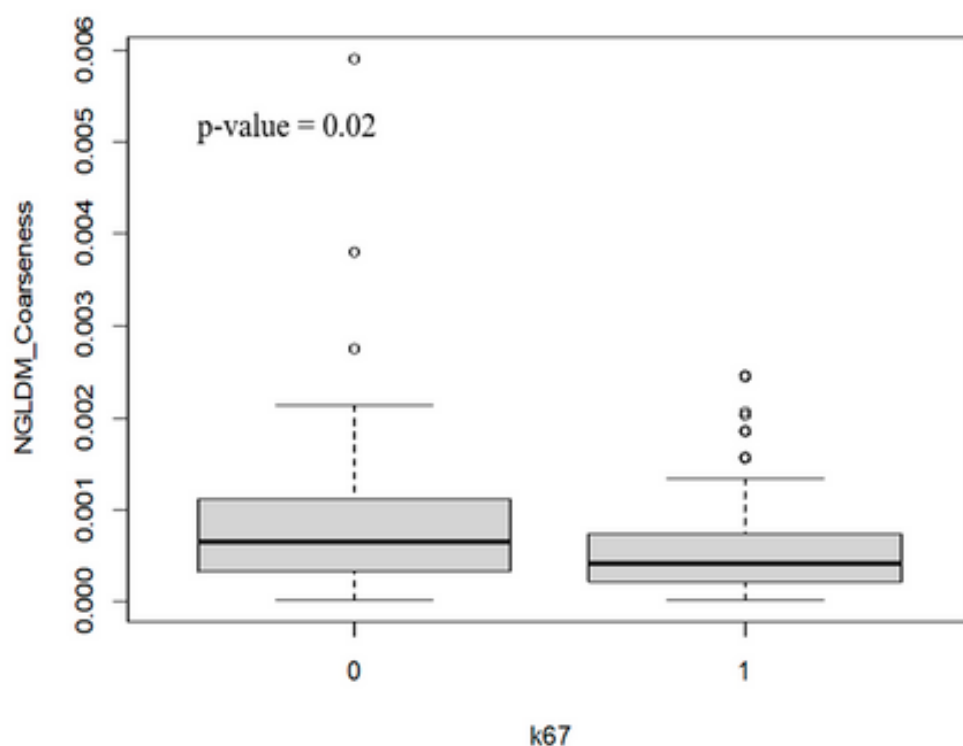

**Supplementary Table S1:** Histological results of surgery.

| Biopsy results (n%)                           |            |
|-----------------------------------------------|------------|
| Cribriform carcinoma                          | 4 (2.0)    |
| Invasive mixed (lobular and ductal) carcinoma | 9 (4.4)    |
| Malignant phylloid                            | 1 (0.5 )   |
| Micropapillary carcinoma                      | 1 (0.5 )   |
| Acinic cell carcinoma                         | 2 (1.0)    |
| High- grade ductal carcinoma in situ          | 6 (2.9)    |
| Low- grade ductal carcinoma in situ           | 4 (2.0)    |
| Intermediate- grade ductal carcinoma in situ  | 11 (5.3)   |
| Invasive ductal carcinoma                     | 139 (67.8) |
| Invasive lobular carcinoma                    | 27 (13.1)  |
| Mucinous carcinoma                            | 1 (0.5)    |
